# Supplementary material for: Combined Analysis of the Metabolome and Transcriptome to Explore Heat Stress Responses and Adaptation Mechanisms in Celery (Apium graveolens L.)
Source: MDPI journal article supplement (doi:10.3390/ijms23063367), 2022-03-20
Supplement: s1 [file s1]

**Table S5** Sequences of primers used in qRT-PCR.

| ID           | Forward primer (5'→3')  | Reverse primer (5'→3')   |
|--------------|-------------------------|--------------------------|
| Ag3G02699    | ACTCCTGCGTCCAGCACCAT    | GCTCTCTGCTACCACCATCGTC   |
| Ag3G00030    | GCACGAGACAGAGCCAGTCAAT  | GCAGAAGGAGCGGTTCCATGTT   |
| Ag3G01708    | TCCAAGCCCAGATCCAACTCCA  | ACCAAAGTCGGGTTTCGGTTCTT  |
| Ag4G02483    | CATAACCCGACCCGGCTCTTTG  | AGCTTCGTGGGCTTTGGTGG     |
| Ag2G00489    | TCCACTGTTGAGGCTCCACTGA  | AGGAGGTAGGTTGCCACCATCA   |
| Ag11G04507   | TGGACCGAAGAGGAGCACAGAT  | GGTGGAGGGACTGGTTGGGTAT   |
| Ag2G01987    | CCGCTTGATCTGATGCCGTTGA  | TCCAGCCCACCGCTTATCTTGA   |
| Ag3G02367    | GCGAGAACGAGCGGTTGAGAA   | CCTGCTGCTGTTGCGAACTACT   |
| Ag9G01446    | CCATCTCGGCTGCTTCAACTCA  | GAGGTGGTCCCTTCTTGGTTCC   |
| Ag1G00765    | AACCCACCTCAGGCTCCACAAA  | GCACGGTACTGCTTGGCATTCA   |
| Ag6G02535    | GGCGTCTGGCAACACGATAGAG  | AGCAGCGTCACCAATCAACCTT   |
| Ag5G00033    | ACCCGACCCGAACCAACTCAA   | TTCTCCGCCGCCACTCGTAA     |
| Ag2G02582    | GCTCAGCGGCACAGTTAGACAT  | AGAGAGTGGGTCGTCAGCAAGA   |
| Ag10G02319   | TCCAGACTCCGACCGATGAAGT  | CGTGCCCAGTCCTCCATTAAGC   |
| Ag7G01236    | TGGCATCGGCTTAACACCTCAG  | CGTTGAGCGTCTAGGCACCAT    |
| Ag10G02014   | GCTGATTTGGCTGTCGGTTTGT  | GGCATAACGGAAGTTGGCTCCTG  |
| Ag2G02950    | TTGTGCCGAGGCAGAGAAGGTT  | CCGTACCGCTGACGAAGCAATG   |
| Ag11G03502   | GGGCTCATGGAACGCTGTTGG   | ACCTCGCTCACTGGCACCTT     |
| Ag1G01316    | TGCTCCACTGGTTGCGACTCT   | ACTCTTCCGAAGGGCAATGGGA   |
| Ag9G00972    | TGCCGCAACGAGGTACAAGGA   | CCTGGCTTCAACTCGCTGACTT   |
| Ag11G04568   | TTGAAGGCGTTGCGATGGAAC   | CCATTCGGCATCCTGGAACACT   |
| Ag6G01127    | TGCTGGCTTGTGACTGGGAAGA  | CCATGCTCTCCTGGCTGTATGC   |
| AgUnG00658   | GCTTGTTTCGGGCTTTAGGAGGT | CGCAGCGGATCTTCTTCCATCA   |
| Ag11G04121   | TGTGGTCACCGTCAATGGAGAG  | CCAATGGCATCACGAGCAACAA   |
| <i>Actin</i> | AGAAGTCCTGTTCCAGCCGTCTT | CGAACCACCACTGAGCACTATGTT |
