# Supplementary material for: Combined Analysis of the Metabolome and Transcriptome to Explore Heat Stress Responses and Adaptation Mechanisms in Celery (Apium graveolens L.)
Source: MDPI journal article supplement (doi:10.3390/ijms23063367), 2022-03-20
Supplement: s1 [file s1]

**Table S1** Transcriptome sequencing data of all samples.

| sample  | Raw reads | Clean<br>reads | Clean<br>bases | Error<br>rate | Q20   | Q30   | GC<br>content | Total map        |
|---------|-----------|----------------|----------------|---------------|-------|-------|---------------|------------------|
| QC1_1_1 | 47182330  | 45067148       | 6.76G          | 0.02          | 98.01 | 94.35 | 43.23         | 43214615(95.89%) |
| QC1_2_1 | 47870824  | 45888780       | 6.88G          | 0.02          | 98.06 | 94.42 | 43.53         | 44115560(96.14%) |
| QC1_3_1 | 43195756  | 41719952       | 6.26G          | 0.03          | 97.85 | 93.99 | 43.51         | 40000315(95.88%) |
| QC2_1_1 | 42878526  | 40922890       | 6.14G          | 0.02          | 97.99 | 94.33 | 43.69         | 38520264(94.13%) |
| QC2_2_1 | 41962100  | 40317306       | 6.05G          | 0.02          | 98.06 | 94.44 | 43.91         | 38215008(94.79%) |
| QC2_3_1 | 46915212  | 44667658       | 6.7G           | 0.02          | 98.04 | 94.49 | 43.66         | 42451987(95.04%) |
| QC3_1_1 | 45979454  | 43375700       | 6.51G          | 0.02          | 98.06 | 94.46 | 42.95         | 41198051(94.98%) |
| QC3_2_1 | 45603628  | 43876620       | 6.58G          | 0.02          | 98.03 | 94.36 | 42.92         | 41630149(94.88%) |
| QC3_3_1 | 42765048  | 41198832       | 6.18G          | 0.03          | 97.87 | 94    | 42.89         | 39062932(94.82%) |
| QC4_1_1 | 43893332  | 42303028       | 6.35G          | 0.03          | 97.92 | 94.12 | 42.93         | 38924055(92.01%) |
| QC4_2_1 | 45944036  | 43188718       | 6.48G          | 0.03          | 97.95 | 94.2  | 42.73         | 40183816(93.04%) |
| QC4_3_1 | 47907140  | 46083850       | 6.91G          | 0.03          | 97.96 | 94.21 | 43.12         | 42365287(91.93%) |
